# Supplementary material for: Evaluating an Intervention Program Using WeChat for Patients With Chronic Obstructive Pulmonary Disease: Randomized Controlled Trial
Source: PubMed Central journal article supplement (PMC7201319; doi:10.2196/17089), 2020-04-21

# 中华人民共和国国家版权局 计算机软件著作权登记证书

证书号： 软著登字第4237383号

软件名称： 肺e康COPD慢性病管理平台软件  
V1.0

著作权人： 蒋玉宇;刘凤兰;郭建兰;孙平平

开发完成日期： 2019年04月30日

首次发表日期： 2019年05月10日

权利取得方式： 原始取得

权利范围： 全部权利

登记号： 2019SR0816631

根据《计算机软件保护条例》和《计算机软件著作权登记办法》的规定，经中国版权保护中心审核，对以上事项予以登记。

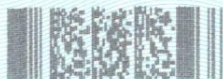

No. 04350085

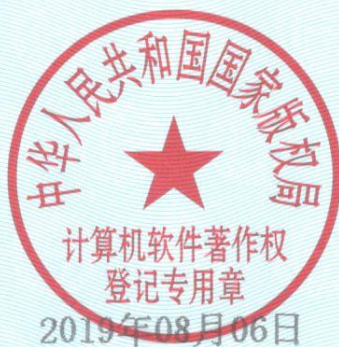

Supplement: jmir_v22i4e17089_app2.pdf [file jmir_v22i4e17089_app2.pdf]
